# Supplementary material
Source: MDPI journal article supplement (https://www.mdpi.com/2073-4395/13/5/1203)
Supplement: s1 [file s1]

**Table S1.** The ScenarioMIP prediction and historical evaluation.

| <b>Model</b>       | <b>scenarios</b> | <b>Gridnum</b> | <b><math>\sigma</math></b> | <b>P</b>       | <b>S</b>       |
|--------------------|------------------|----------------|----------------------------|----------------|----------------|
| BCC                | SSP126           | 160× 320       | 1.03591                    | 0.93323        | 0.93867        |
| BCC                | SSP245           |                | 1.02156                    | 0.93341        | 0.93975        |
| BCC                | SSP370           |                | 1.01483                    | 0.93259        | 0.93839        |
| BCC                | SSP585           |                | 1.02955                    | 0.93184        | 0.93634        |
| EC-Earth           | SSP126           | 256× 512       | <b>1.00502</b>             | <b>0.96258</b> | <b>0.99820</b> |
| EC-Earth           | SSP245           |                | <b>1.01943</b>             | <b>0.96137</b> | <b>0.99540</b> |
| EC-Earth           | SSP370           |                | <b>1.00964</b>             | <b>0.96345</b> | <b>0.99991</b> |
| EC-Earth           | SSP585           |                | <b>1.02409</b>             | <b>0.96296</b> | <b>0.99844</b> |
| GFDL               | SSP126           | 180× 288       | 0.94545                    | 0.95284        | 0.97548        |
| GFDL               | SSP245           |                | 0.94764                    | 0.95071        | 0.97148        |
| GFDL               | SSP370           |                | 0.95038                    | 0.95075        | 0.97185        |
| GFDL               | SSP585           |                | 0.93762                    | 0.95279        | 0.97440        |
| INM-CM5-0          | SSP126           | 120× 180       | 0.91217                    | 0.92097        | 0.90852        |
| INM-CM5-0          | SSP245           |                | 0.91584                    | 0.92157        | 0.91031        |
| INM-CM5-0          | SSP370           |                | 0.90216                    | 0.92034        | 0.90539        |
| INM-CM5-0          | SSP585           |                | 0.91692                    | 0.92300        | 0.91321        |
| MPI-ESM1-2-HR      | SSP126           | 192× 384       | 0.92197                    | 0.94537        | 0.95733        |
| MPI-ESM1-2-HR      | SSP245           |                | 0.94980                    | 0.94520        | 0.96078        |
| MPI-ESM1-2-HR      | SSP370           |                | 0.92498                    | 0.94360        | 0.95436        |
| MPI-ESM1-2-HR      | SSP585           |                | 0.91991                    | 0.94368        | 0.95367        |
| Multi-mode average | SSP126           | -              | 0.95514                    | 0.95205        | 0.97491        |
| Multi-mode average | SSP245           |                | 0.96178                    | 0.95162        | 0.97464        |
| Multi-mode average | SSP370           |                | 0.95131                    | 0.95149        | 0.97343        |
| Multi-mode average | SSP585           |                | 0.95707                    | 0.95151        | 0.97402        |
