# Supplementary material
Source: MDPI journal article supplement (https://www.mdpi.com/2073-4395/13/5/1203)
Supplement: s1 [file s1]

**Table S2.** Table of GBRT hyperparameters.

| Agricultural zones | Model   | Learning rate | Max depth | N estimators |
|--------------------|---------|---------------|-----------|--------------|
| 3HP                | history | 0.1           | 3         | 1000         |
|                    | SSP126  | 0.1           | 3         | 1000         |
|                    | SSP245  | 0.1           | 3         | 1000         |
|                    | SSP370  | 0.1           | 3         | 1000         |
|                    | SSP585  | 0.1           | 3         | 1000         |
| LP                 | history | 0.1           | 3         | 1000         |
|                    | SSP126  | 0.01          | 3         | 1000         |
|                    | SSP245  | 0.01          | 3         | 1000         |
|                    | SSP370  | 0.1           | 3         | 200          |
|                    | SSP585  | 0.1           | 3         | 800          |
| MYP                | history | 0.1           | 3         | 100          |
|                    | SSP126  | 0.01          | 3         | 800          |
|                    | SSP245  | 0.01          | 3         | 1000         |
|                    | SSP370  | 0.01          | 3         | 800          |
|                    | SSP585  | 0.1           | 3         | 200          |
| NAS                | history | 0.01          | 3         | 1000         |
|                    | SSP126  | 0.01          | 3         | 1000         |
|                    | SSP245  | 0.01          | 3         | 1000         |
|                    | SSP370  | 0.1           | 3         | 200          |
|                    | SSP585  | 0.1           | 3         | 1000         |
| NEP                | history | 0.1           | 3         | 1000         |
|                    | SSP126  | 0.1           | 3         | 1000         |
|                    | SSP245  | 0.1           | 3         | 200          |
|                    | SSP370  | 0.1           | 3         | 800          |
|                    | SSP585  | 0.01          | 3         | 1000         |
| QTP                | history | 0.01          | 3         | 1000         |
|                    | SSP126  | 0.01          | 3         | 1000         |
|                    | SSP245  | 0.01          | 3         | 1000         |
|                    | SSP370  | 0.1           | 3         | 1000         |
|                    | SSP585  | 0.1           | 5         | 800          |
| SBS                | history | 0.1           | 3         | 500          |
|                    | SSP126  | 0.1           | 3         | 800          |
|                    | SSP245  | 0.1           | 5         | 200          |
|                    | SSP370  | 0.5           | 5         | 200          |
|                    | SSP585  | 0.1           | 3         | 1000         |
| SC                 | history | 0.01          | 3         | 1000         |
|                    | SSP126  | 0.1           | 3         | 1000         |
|                    | SSP245  | 0.1           | 3         | 1000         |
|                    | SSP370  | 0.01          | 3         | 1000         |
|                    | SSP585  | 0.1           | 3         | 1000         |
| YGP                | history | 0.1           | 3         | 200          |
|                    | SSP126  | 0.1           | 3         | 1000         |
|                    | SSP245  | 0.01          | 3         | 1000         |
|                    | SSP370  | 0.01          | 3         | 1000         |
|                    | SSP585  | 0.01          | 3         | 1000         |
| --                 | SSP126  | 0.5           | 3         | 500          |
|                    | SSP245  | 0.1           | 3         | 100          |
|                    | SSP370  | 0.1           | 3         | 100          |
|                    | SSP585  | 0.01          | 3         | 1000         |
